# Supplementary material for: Investigating Ex Vivo Animal Models to Test the Performance of Intravitreal Liposomal Drug Delivery Systems
Source: MDPI journal article supplement (doi:10.3390/pharmaceutics13071013), 2021-07-02
Supplement: s1 [file s1]

# Supplementary Materials: Investigating Ex Vivo Animal Models to Test the Performance of Intravitreal Liposomal Drug Delivery Systems

Gustav Christensen, Leon Barut, Dileep Urimi, Nicolaas Schipper, and François Paquet-Durand

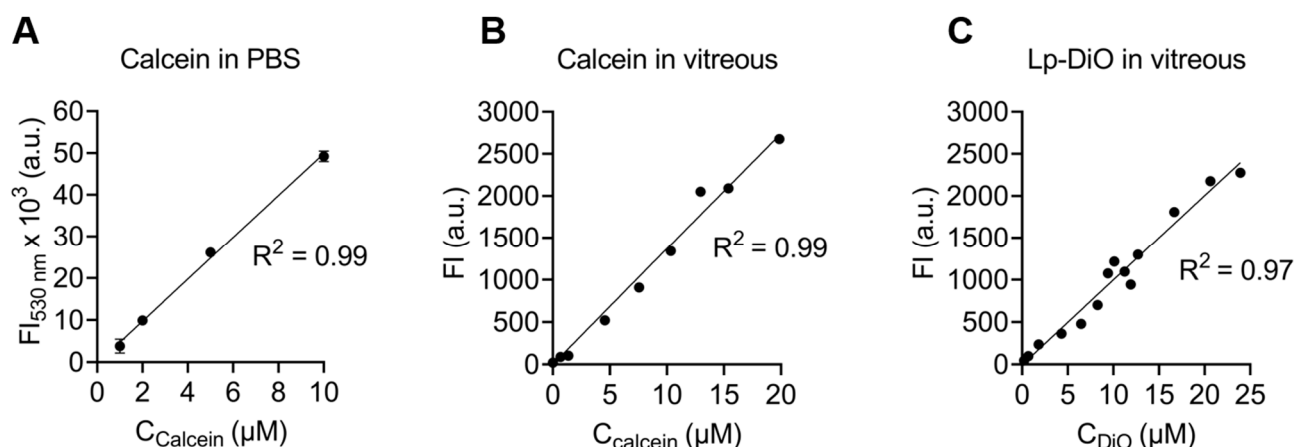

**Figure S1.** Standard curves of calcein and DiO. **(A)** Calcein in PBS, measured at 530 nm. **(B)** Calcein in extracted porcine vitreous, measured on an FM-2 Fluorotron Master. **(C)** DiO-loaded liposomes (Lp-DiO) in extracted porcine vitreous, measured on an FM-2 Fluorotron Master. All data points were fitted with linear regression using GraphPad Prism 8. All  $p$ -values < 0.0001.
